# Supplementary material for: Development and Validation of Analytical Procedure for Elemental Impurities in Rosuvastatin Calcium Tablets by ICP-MS and Microwave Digestion
Source: Hindawi journal article supplement (doi:10.1155/2024/9952318), 2024-03-26
Supplement: f1 [file 9952318.f1.pdf]

# Autotune Report

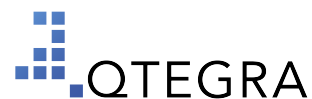

## System

Start time: 2019-08-08 14:55:04  
Instrument: iCAP RQ  
User: 942AI0075\fajuanGMP  
Template: SourceTune High Matrix  
Instrument Serial Number: RQ01490  
Solution: No solution specified  
End time: 2019-08-08 15:04:55  
Result: The autotuning was successful.

## Intensity Changes

| Analyte         | Original result | Tuned result |
|-----------------|-----------------|--------------|
| 115In           | 1020837         | 1026176      |
| 140Ce           | 1060561         | 1104539      |
| 140Ce.16O       | 21614           | 20603        |
| 7Li             | 315229          | 289008       |
| 59Co            | 611814          | 580642       |
| 238U            | 1401504         | 1635416      |
| 140Ce.16O/140Ce | 0.0204          | 0.0187       |

## Control Changes

| Control                   | Unit    | Original value | Tuned value |
|---------------------------|---------|----------------|-------------|
| Nebulizer Flow            | [l/min] | 1.01           | 0.9964      |
| Torch Horizontal Position | [mm]    | 0              | 0           |
| Torch Vertical Position   | [mm]    | 0.75           | 0.77        |
| Extraction Lens 2         | [V]     | -166           | -200.7      |
| CCT Focus Lens            | [V]     | 3.6            | 3.6         |

## Graphical Results

Stage name: Torch position  
Control: Torch Horizontal Position  
Analyte: 115In

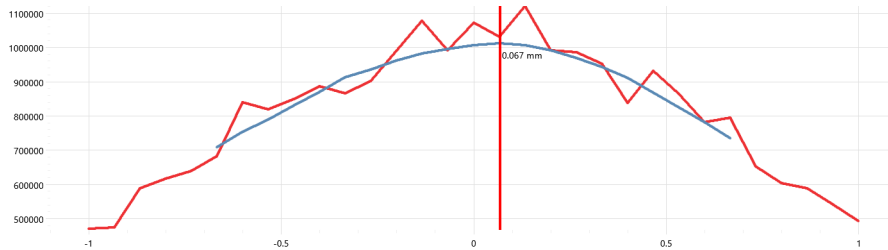

Stage name: Torch position  
Control: Torch Vertical Position  
Analyte: 115In

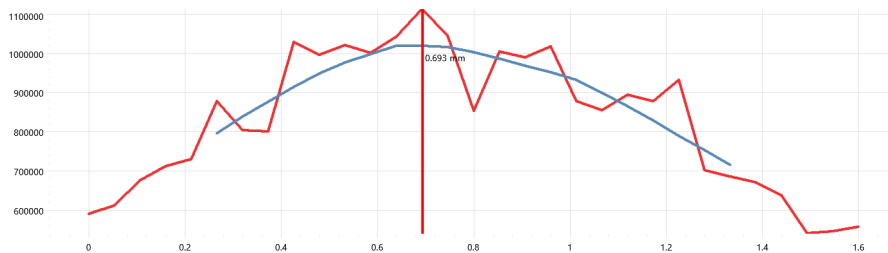

Stage name: Nebulizer (2.5% CeO)  
Control: Nebulizer Flow  
Analyte: 115In

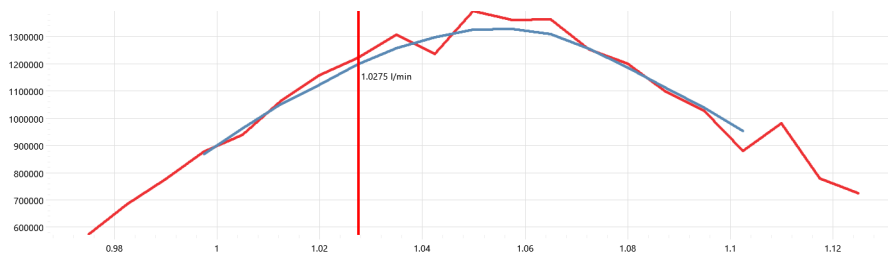

Stage name: Nebulizer (2.5% CeO)  
Control: Nebulizer Flow  
Analyte: 140Ce.16O/140Ce

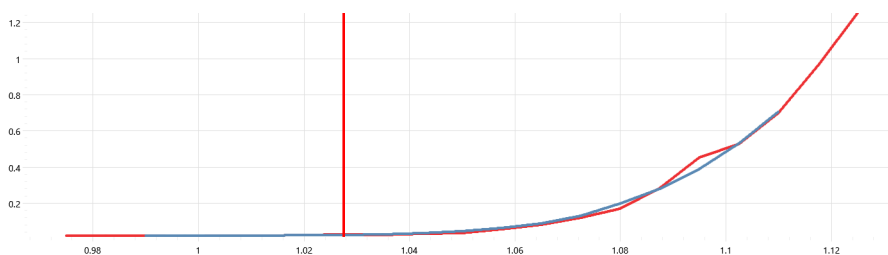

Stage name: Torch position again  
Control: Torch Horizontal Position

# Autotune Report

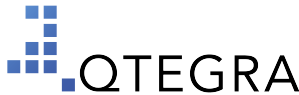

Analyte: 115In

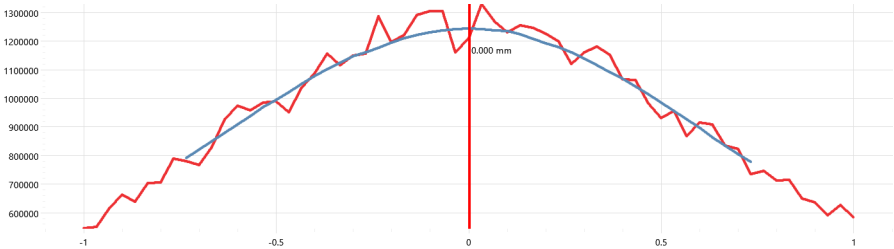

Stage name: Torch position again  
Control: Torch Vertical Position  
Analyte: 115In

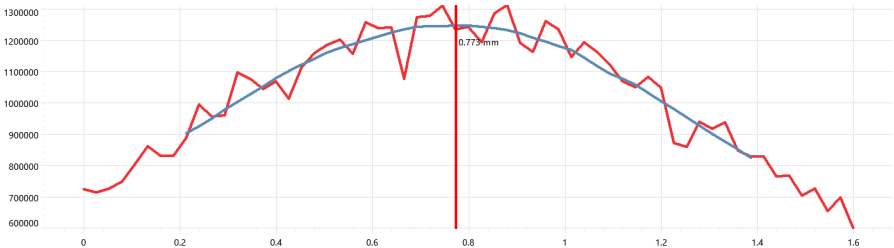

Stage name: Extraction Lens 2  
Control: Extraction Lens 2  
Analyte: 115In

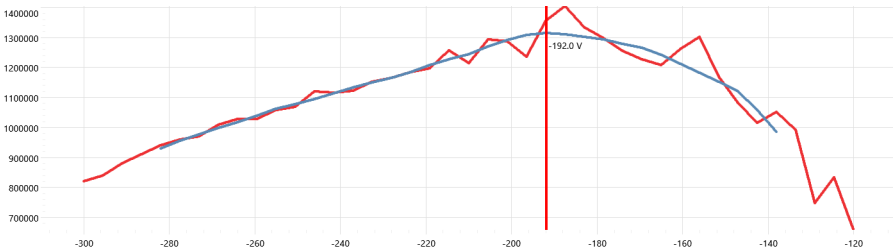

Stage name: CCT Focus Lens  
Control: CCT Focus Lens  
Analyte: 238U

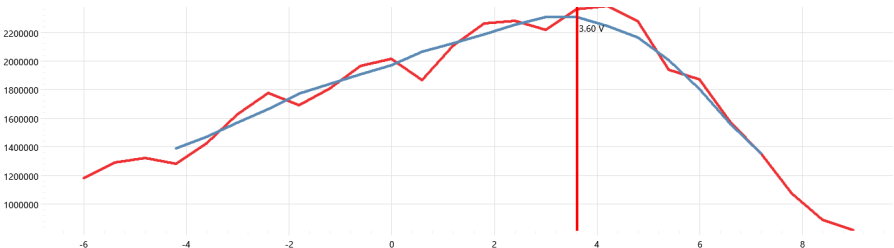

Stage name: Nebulizer (1.9 % CeO)  
Control: Nebulizer Flow  
Analyte: 115In

# Autotune Report

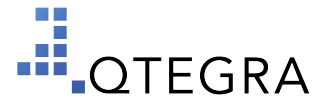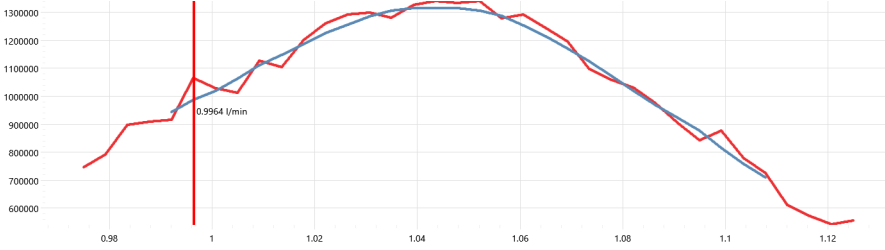

Stage name: Nebulizer (1.9 % CeO)  
Control: Nebulizer Flow  
Analyte: 140Ce.16O/140Ce

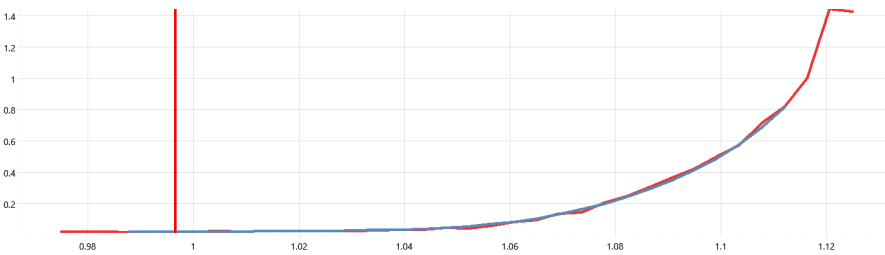

Stage name: Extraction Lens 2 @ final Plasma Temperature  
Control: Extraction Lens 2  
Analyte: 59Co

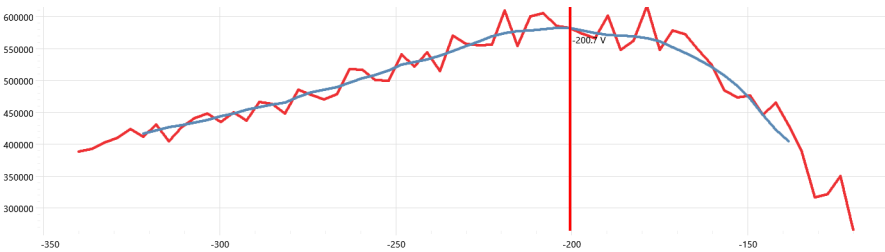

Stage name: CCT Focus Lens @ final Plasma Temperature  
Control: CCT Focus Lens  
Analyte: 7Li

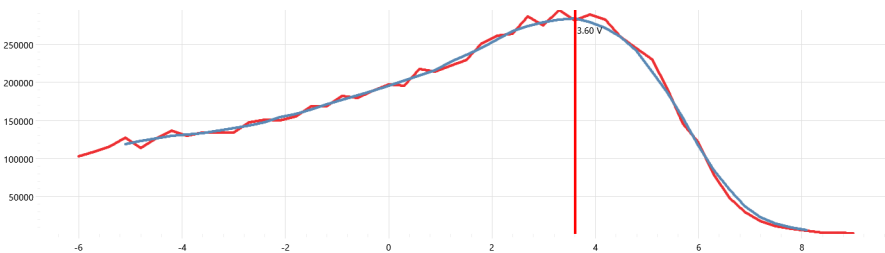

Stage name: CCT Focus Lens @ final Plasma Temperature  
Control: CCT Focus Lens  
Analyte: 238U

# Autotune Report

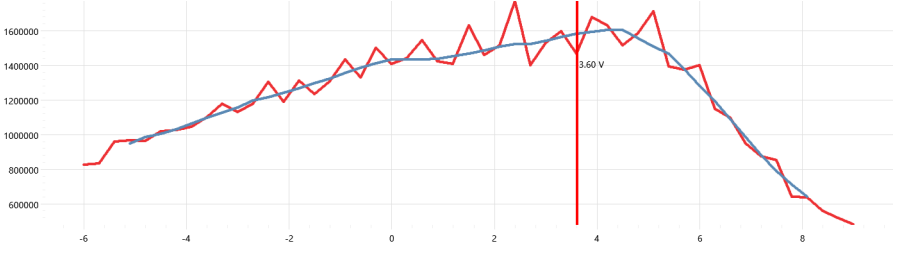

# Autotune Report

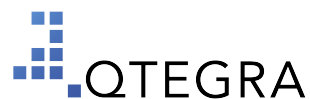

## Tune Settings

| Parameter                              | Value                 |
|----------------------------------------|-----------------------|
| Additional Gas Flow 1                  | 0                     |
| Additional Gas Flow 2                  | 0                     |
| Additional Gas Flow 3                  | 0                     |
| CCT Entry Lens                         | -106                  |
| Angular Deflection                     | -382.4                |
| Deflection Entry Lens                  | -35                   |
| Extraction Lens 1 Polarity             | 0                     |
| Extraction Lens 1 Negative             | 0                     |
| Extraction Lens 1 Positive             | 0                     |
| Spray Chamber Temperature              | 2.7                   |
| Peristaltic Pump Speed                 | 40                    |
| Cool Flow                              | 14                    |
| Sampling Depth                         | 5                     |
| Plasma Power                           | 1550                  |
| Auxilliary Flow                        | 0.8                   |
| Nebulizer Flow                         | 0.996428571428573     |
| Torch Horizontal Position              | -1.38777878078145E-17 |
| Torch Vertical Position                | 0.7733333333333333    |
| Extraction Lens 2                      | -200.6666666666666    |
| CCT Focus Lens                         | 3.6                   |
| CCT Bias                               | -2                    |
| CCT Exit Lens                          | -160                  |
| Focus Lens                             | 17.4                  |
| D1 Lens                                | -195.2                |
| D2 Lens                                | -80                   |
| Quad Entry Lens                        | -32.2                 |
| Pole Bias                              | -1                    |
| CCT1 Flow                              | 0                     |
| CCT1 Shut-Off Valve                    | 0                     |
| Virtual CCT Mass to Dac Factor         | 130                   |
| Virtual CCT Mass to Dac Offset         | -167.5                |
| Virtual CCT Mass parameter b           | 0.65                  |
| Virtual CCT Mass Maximum Dac Limit Set | 4095                  |
